# Supplementary material for: Associations of exercise-induced hormone profiles and gains in strength and hypertrophy in a large cohort after weight training
Source: PubMed Central journal article supplement — Eur J Appl Physiol. 2011 Nov 22;112(7):2693–702. doi: 10.1007/s00421-011-2246-z (PMC3371329; doi:10.1007/s00421-011-2246-z), 2011-11-22
Supplement: 421_2011_2246_MOESM1_ESM.pdf [file 421_2011_2246_MOESM1_ESM.pdf]

|                         | Pre       | Post     | P      |
|-------------------------|-----------|----------|--------|
| <b>PHYSICAL</b>         |           |          |        |
| Age (y)                 | 23±2      | –        |        |
| Ht (m)                  | 1.80±0.11 | –        |        |
| BW (kg)                 | 80.9±3.6  | 83.4±2.9 | <0.001 |
| BF (kg)                 | 14.8±1.9  | 14.2±2.1 | 0.023  |
| LBM (kg)                | 63.1±2.1  | 66.2±2.2 | 0.006  |
| <b>DIETARY INTAKE</b>   |           |          |        |
| Energy (kJ/kg/d)        | 158±15    | 160±17   | 0.026  |
| Protein (g/kg/d)        | 1.3±0.2   | 1.6±0.3  | 0.021  |
| Carbohydrate (g/kg/d)   | 4.9±0.4   | 4.7±0.6  | 0.35   |
| Fat (g/kg/d)            | 1.3±0.1   | 1.2±0.1  | 0.42   |
| <b>STRENGTH (1RM)</b>   |           |          |        |
| Leg Press (kg)          | 203±14    | 395±21   | <0.001 |
| Knee Extension (kg)     | 127±14    | 200±12   | <0.001 |
| Hamstring Curl (kg)     | 73±4      | 111±6    | <0.001 |
| Flat Bench Press (kg)   | 59±5      | 92±9     | <0.001 |
| Military Press (kg)     | 43±4      | 75±6     | <0.001 |
| Wide Grip Pulldown (kg) | 59±6      | 94±8     | <0.001 |

Reference List

Hartman JW, Tang JE, Wilkinson SB, Tarnopolsky MA, Lawrence RL, Fullerton AV, & Phillips SM (2007). Consumption of fat-free fluid milk after resistance exercise promotes greater lean mass accretion than does consumption of soy or carbohydrate in young, novice, male weightlifters. *Am J Clin Nutr* **86**, 373-381.
